# Supplementary material for: Continental-scale wildfires during end-Triassic greenhouse warming
Source: Research Square preprint supplement (doi:10.21203/rs.3.rs-8211214/v1), 2025-12-02
Supplement: Supplementary file 1 [file 026c3f094a34cfe0280eee43.xlsx]

## Sheet: PDI
Supplementary Data 1A - Average PDI values for Schandelah-1, Prees-2, Stenlille-4 and Elvange
Schandelah			Prees-2C			Stenlile-4			Elvange
mbs	Average PDI		depth mccd	Average PDI		mbs	Average PDI		mbs	Average PDI
338	59.2839		464.84	36.9975		1525.23	37.283		64.95	24.5646
337.7	61.7844		469.18	30.4197		1523.79	41.8555		64.5	20.7071
337.5	58.2488		472.44	44.0131		1523.28	41.755		64.29	30.8657
337.2	55.2592		478.43	26.4977		1522.8	46.758		63.87	32.5619
336.8	54.2157		482.42	23.5269		1522.33	50.665		63.45	23.3913
336.5	56.3169		486.33	33.1644		1521.23	50.6597		62	41.0076
336.2	55.5219		490.44	31.9737		1520.56	49.1602		61.86	31.8894
336	55.8591		494.43	40.4923		1519.68	42.8031		61.4	43.189
335.8	60.7827		498.37	39.5448		1518.8	40.0402		60.63	37.2929
335.5	55.6924		501.37	33.0075		1517.86	48.1347		60.09	24.0915
335.3	55.3331		504.45	32.863		1517.23	39.8197		59.94	40.404
335	55.6172		508.47	37.9832		1516.95	36.2097		58.72	37.3216
334.6	31.7018		511.47	34.1194		1516.13	30.9981		57.68	29.906
334	41.2779		514.35	37.6837		1514.91	38.7397		57.01	35.3297
333.5	41.2462		517.33	34.7969		1514.14	35.5802		56.45	41.6904
333.2	45.9622		519.31	34.6656		1513.58	33.2847		56.05	70.7966
333	45.3108		525.24	23.3352		1513.03	38.4202		55.99	69.9978
332.5	38.9253		528.21	28.0507		1512.85	38.6136		55.69	71.6031
332.1	50.3405		533.44	30.3409		1512.35	39.2311		55.31	70.809
331.6	55.4093		537.39	43.1856		1512.15	42.3821		55.01	69.8604
331	51.7274		540.39	28.9989		1511.75	39.6807		54.39	71.3179
329.8	56.1245		544.27	31.76		1511.64	39.2138		54.03	72.0383
329.5	53.2302		547.27	34.2749		1511.47	43.2795		53.5	69.23
328.5	60.2148		549.28	36.2761		1511.26	36.1575		52.46	69.5553
327.8	60.1016		550.36	29.2958		1510.95	52.3416		51.99	71.2807
327.3	57.61		551.36	38.549		1510.16	54.0221		51.05	70.479
326.5	65.0258		552.36	38.4306		1509.97	58.7955		50.82	62.363
325.5	67.2697		554.36	33.5806		1509.17	54.5639		50.48	57.7043
325	65.7942		555.36	19.7572		1508.83	54.0846		50.29	49.1933
324.1	64.1988		556.44	51.8459		1508.37	58.8936		50.1	41.5308
323.7	63.4285		557.42	25.8903		1507.8	67.3573		49.66	42.0837
323.4	66.0584		558.42	38.4798		1506.99	66.3533		48.78	47.1031
323.1	69.5746		559.42	38.1517		1506.47	65.1917		48.48	31.0292
322.7	64.262		559.53	39.9969		1506.1	72.2332		47.99	36.7253
322.5	69.0912		560.56	17.4385		1505.99	61.9087		46.99	43.6382
322	69.321		561.56	12.0671		1505.4	57.1243		46.56	30.6278
321.5	66.4918		562.55	32.6588		1504.85	67.0291		46	36.1942
321.1	71.6836		563.55	28.1749		1504.6	65.0914		45.26	40.0475
320.2	65.2238		564.82	47.9652		1504.3	60.6421		44.96	36.4967
319.8	62.278		566.03	31.035		1503.42	57.8486		44.5	34.9874
319.66	58.2252		566.97	37.9293		1502.39	57.3235		43.96	19.9744
319.5	66.4887		567.52	48.3433		1502.15	51.2117
319.4	64.1245		568.53	27.9783		1501.9	59.4636
319.3	67.5948		569.52	37.0535		1501.84	35.6921
319.2	68.1781		570.51	30.5133		1501.81	31.151
319.1	64.3268		571.41	35.6757		1501.8	49.0701
319	66.2312		572.5	31.3603		1501.6	48.0559
318.9	62.0269		575.18	33.7207		1501.42	46.0666
318.8	63.8999		575.93	37.1029		1501.38	38.7934
318.6	36.9719		576.92	34.7396		1500.8	40.6702
318.5	34.332		577.9	39.2897		1500.51	44.1359
318.2	30.4336		578.91	36.7234		1499.79	38.4845
317.1	39.2516		579.92	25.5085		1499.56	37.1962
315.9	34.1782		580.7	41.0255		1499.3	36.3325
315.1	30.2309		583.75	27.1808		1498.51	37.1877
314.1	26.5112		585.78	16.7713		1498.03	38.2623
313.1	27.7677		586.78	34.5365		1497.56	31.9747
312.2	26.3273		587.78	27.6383		1497.11	27.9164
310.9	31.4672		589.19	30.8388		1496.49	33.7155
310.4	34.213		590.2	28.884		1495.87	30.2735
309.2	31.3624		591.2	25.1775		1495.52	34.5857
308	38.3411		592.31	50.0746		1494.87	28.922
307.1	35.9444		592.64	49.1798		1494.5	25.9988
306	30.3171		592.8	61.2997		1494.14	32.4644
304	40.3631		593.08	64.0437		1493.95	36.4238
300	41.292		593.18	51.3261		1493.1	36.8779
293.9	39.011		593.19	67.4101		1492.82	38.3784
290	36.1944		594.18	40.0996		1492.52	30.7975
284	38.0228		594.95	73.1749
282	41.4053		595.44	52.0419
275.1	37.2952		595.49	72.002
272	39.6266		595.79	75.5972
268.9	32.7021		596.52	63.7751
267.1	28.4302		597.19	42.0082
265.9	36.2691		598.1	39.9688
265	37.0019		598.5	36.0598
263.8	32.5247		599.05	28.2594
263	29.5032		599.8	35.5146
261	33.775		600.49	28.0157
260	34.5983		600.81	30.1537
259	32.4074		601.68	28.0867
258.5	49.563		602.19	23.1758
258.1	45.3865		603.46	40.0872
257.5	47.5149		604.3	34.6747
257	43.9299		607.36	28.6304
256.3	45.1077
255.6	50.117
255	41.2573
254	47.6462
253	30.9284
252	36.1694
251	32.0734
250	34.9925
249	30.1832
247	33.8534
245	29.8531
243	29.2626
242.3	31.1087
241.4	31.5204
241.1	30.7892
240.2	32.3204
239.1	46.9789
239	46.9161
238	44.4521
237.9	49.5025
237.3	45.3627
237	43.2919
236.6	43.7681
235.9	43.8625
235.2	45.1542
234.5	40.326
233.9	35.2949

## Sheet: Organic carbon isotopes
Supplementary Data 1B - Carbon isotope data for Stenlille-4 and Elvange
Stenlile-4			Elvange
Depth	δ13Corg		Depth	δ13Corg
(m)	(‰ V-PDB)		(m)	(‰ V-PDB)
1492.54	-25.5		43.96	-27.4547
1494.52	-24.9		44.07	-27.4247
1494.88	-25		44.5	-27.4657
1495.53	-25.5		44.96	-27.2037
1495.88	-25.4		45.26	-27.4327
1496.51	-25.3		45.46	-27.7377
1497.12	-25.5		46	-27.7127
1497.57	-25.5		46.5	-28.3277
1498.04	-25.9		46.99	-27.4787
1498.18	-26.1		47.99	-27.8007
1498.51	-25.5		48.48	-29.4307
1499.3	-26		48.78	-28.6087
1499.51	-25.8		49.66	-28.4797
1499.51	-25.8		50.1	-28.8137
1499.55	-26		50.29	-25.3607
1499.8	-25.8		50.48	-25.5217
1500.1	-25.8		50.82	-25.0037
1500.5	-25.9		51.05	-24.9827
1500.75	-25.8		51.55	-24.8057
1500.75	-26		51.99	-24.7187
1500.75	-26.1		52.46	-24.8067
1500.8	-26		53.5	-24.8537
1501.39	-26.2		54.03	-24.6937
1501.42	-26.6		54.39	-24.9007
1501.6	-26.5		55.01	-24.6337
1501.79	-29		55.31	-24.8197
1501.81	-28.4		55.69	-25.0667
1501.84	-28.2		55.99	-25.2257
1502.01	-25.4		56.05	-26.0177
1502.35	-25.6		56.45	-27.2477
1503.92	-25		57.01	-26.7497
1504.28	-25.7		57.68	-26.8137
1504.6	-24.4		58.72	-26.8027
1504.9	-24.7		59.94	-26.4717
1505.4	-25.2		60.09	-26.0967
1505.98	-24.7		60.63	-30.3227
1506.1	-28.4		61.4	-28.2737
1506.49	-24.4		61.86	-26.7067
1507.01	-26.4		62	-28.0257
1507.17	-26		63.45	-25.2367
1507.25	-26.3		63.87	-24.9907
1507.57	-25.5		64.29	-25.2467
1507.85	-24.9		64.5	-27.9377
1508.39	-25.1		64.95	-28.3027
1508.8	-25.1
1509.15	-25.1
1509.17	-24.6
1509.48	-25.2
1509.92	-25.6
1510	-25.2
1510.18	-24.7
1510.97	-24.6
1511.26	-24.7
1511.64	-25.1
1511.71	-25
1512.14	-25.8
1512.34	-26
1512.75	-24.9
1512.85	-24.9
1513.03	-25.8
1513.31	-25.3
1513.35	-24.9
1513.58	-25.5
1513.72	-25.2
1514.15	-26.7
1514.43	-24.8
1514.53	-24.8
1514.91	-25.4
1516.13	-25
1516.34	-24.7
1516.54	-24.5
1516.95	-26.6
1517.23	-26
1517.3	-25.9
1517.65	-25
1517.86	-26.1
1518.36	-26.3
1518.79	-26.1
1519.12	-24.4
1519.68	-27.7
1519.7	-26
1520.56	-26.2
1521.21	-26.3
1521.83	-25.9
1522.33	-25.7
1522.8	-26.2
1523.28	-26.1
1523.79	-25.8

## Sheet: PAHs
Sample ID	Depth	Coronene Index	Coronene / Benzo(a)pyrene
	(m)
SCH-	200.1	0.41	6.012
SCH-	205.2	0.394	4.741
SCH-	209.3	0.403	5.662
SCH-	214.1	0.239	5.435
SCH-	218.1	0.354	5.528
SCH-	221.1	0.346	6.234
SCH-	226.1	0.278	5.786
SCH-	230.1	0.258	4.289
SCH-	232.1	0.319	6.079
SCH-	233.3	0.249	4.589
SCH-	234.8	0.482	3.162
SCH-	236.1	0.441	4.123
SCH-	237.4	0.414	3.848
SCH-	240.7	0.244	1.289
SCH-	244.2	0.26	1.236
SCH-	251.2	0.222	1.225
SCH-	255.6	0.492	5.045
SCH-	256.7	0.437	4.102
SCH-	257.8	0.429	3.781
SCH-	260.3	0.274	1.583
SCH-	266	0.222	2.366
SCH-	270	0.237	2.677
SCH-	275	0.288	2.663
SCH-	277	0.319	3.513
SCH-	280	0.352	2.353
SCH-	282	0.303	1.948
SCH-	284	0.336	2.996
SCH-	286	0.401	4.004
SCH-	290	0.273	2.634
SCH-	295.5	0.3	3.189
SCH-	299.5	0.296	2.421
SCH-	300.5	0.33	2.632
SCH-	302	0.277	2.241
SCH-	303.5	0.216	1.918
SCH-	305	0.318	2.195
SCH-	306.5	0.318	2.324
SCH-	308	0.338	2.569
SCH-	309.5	0.265	1.984
SCH-	310.5	0.291	1.928
SCH-	311	0.311	2.17
SCH-	312.4	0.365	2.119
SCH-	314	0.282	2.189
SCH-	315.5	0.292	3.819
SCH-	316.5	0.283	3.291
SCH-	317	0.223	2.206
SCH-	317.5	0.32	3.233
SCH-	317.7	0.224	3.381
SCH-	317.8	0.199	2.381
SCH-	318.1	0.168	2.053
SCH-	318.5	0.213	3.071
SCH-	319.5	0.411	6.763
SCH-	320	0.465	8.801
SCH-	320.5	0.439	8.083
SCH-	321.3	0.331	4.508
SCH-	322.2	0.515	8.88
SCH-	322.5	0.548	11.422
SCH-	323	0.359	4.182
SCH-	324	0.329	2.781
SCH-	324.4	0.34	3.053
SCH-	325.7	0.391	5.031
SCH-	326	0.336	3.384
SCH-	328.5	0.403	5.47
SCH-	329	0.349	3.337
SCH-	330	0.306	3.425
SCH-	331.5	0.339	4.14
SCH-	333.5	0.271	3.015
SCH-	334	0.123	0.487
SCH-	334.5	0.187	1.034
SCH-	334.8	0.057	0.167
SCH-	336	0.371	3.789
SCH-	336.5	0.372	4.727
SCH-	337	0.315	2.714
SCH-	337.5	0.357	2.756
