# Supplementary material for: Continental-scale wildfires during end-Triassic greenhouse warming
Source: Research Square preprint supplement (doi:10.21203/rs.3.rs-8211214/v1), 2025-12-02
Supplement: Supplementary file 2 [file a5fa9555db947a2504a0b7c2.xlsx]

## Sheet: PAH Quantification 
Supplementary Data 2 - PAH quantification for Schandelah-1 core
Sample ID	Depth	B[a]a	Chry	3.4-di	B[k]f	B[e]f	B[e]p	B[a]p	Pery	IndenoP	B[ghi]p	Cor
	(m)	(mg/ g TOC)	(mg/ g TOC)	(mg/ g TOC)	(mg/ g TOC)	(mg/ g TOC)	(mg/ g TOC)	(mg/ g TOC)	(mg/ g TOC)	(mg/ g TOC)	(mg/ g TOC)	(mg/ g TOC)
SCH-	234.8	4.23401	7.4702	0.302075	17.0881	6.51869	2.97498	7.73993	3.81757	2.10787	23.275	24.4716
SCH-	236.1	1.15832	11.7558	1.06879	3.97854	15.8713	3.19655	5.43862	7.78317	2.10815	25.2175	22.4233
SCH-	237.4	3.6387	8.01289	1.06366	15.751	7.61305	4.0521	5.49241	4.67929	2.65502	25.9064	21.1354
SCH-	240.7	1.72304	7.96038	0.8195	6.40956	2.56494	5.49466	10.6473	11.3536	2.29112	37.0085	13.7273
SCH-	244.2	2.0897	8.87638	1.87964	6.67131	1.65822	4.93009	11.185	11.8801	2.53414	34.4746	13.8209
SCH-	251.2	1.87856	7.52305	0.341305	3.72036	4.07984	2.35519	10.4532	12.4685	1.74298	42.6332	12.8038
SCH-	255.6	0.692139	8.11308	0.359063	7.15104	11.7385	2.02779	5.56426	7.10601	2.16879	27.0094	28.07
SCH-	256.7	3.03064	5.96541	0.263621	16.3736	4.67118	2.71627	6.18733	3.22533	2.26305	29.9252	25.3784
SCH-	257.8	2.55902	7.51863	0.263858	17.614	6.53514	4.02757	5.96229	2.43403	4.597	25.9433	22.5452
SCH-	260.3	1.18727	9.10038	0.566784	6.72501	3.12412	2.4273	9.92525	10.0019	2.00947	39.22	15.7125
SCH-	266	0.943081	3.49876	0.088469	2.23968	3.65016	4.31818	6.65096	9.08311	2.84216	50.9461	15.7393
SCH-	270	1.19103	4.27552	0.244613	4.1981	2.89447	4.28351	6.19411	8.46756	2.45405	49.2126	16.5845
SCH-	275	1.72545	6.29104	0.527452	4.16571	5.66353	3.73772	6.99838	7.55244	2.42382	42.2765	18.6379
SCH-	277	2.02035	8.0696	0.333357	5.47895	6.97938	4.33228	5.71454	5.77018	2.79171	38.4347	20.075
SCH-	280	3.04033	10.4442	0.523024	11.866	6.77949	5.7236	7.41155	7.63469	2.73612	26.4046	17.4365
SCH-	282	2.93904	10.2846	0.254725	12.7773	7.84946	5.74577	7.76748	5.39679	2.83273	29.0243	15.1278
SCH-	284	1.66766	9.87392	2.34098	7.97289	9.71227	5.32655	6.04328	5.71991	2.75958	30.4776	18.1054
SCH-	286	2.36333	9.58133	1.00082	8.59642	9.01726	4.89116	5.80123	3.73507	2.02555	29.7573	23.2305
SCH-	290	1.42417	7.69393	0.955774	3.46183	6.774	4.28314	6.54233	7.19401	2.8993	41.5365	17.235
SCH-	295.5	1.69893	7.41869	0.532596	6.47183	5.33488	4.94396	5.92323	6.14073	3.50293	39.1455	18.8867
SCH-	299.5	3.31028	9.77884	0.951772	8.90783	9.24621	4.86202	6.21776	7.51264	3.15011	31.0104	15.0521
SCH-	300.5	2.64891	12.2862	0.895336	9.5831	10.3959	5.04921	5.87821	8.83421	2.62491	26.3327	15.4714
SCH-	302	2.25455	8.36323	0.569377	6.84358	9.53366	4.73875	6.63746	9.43691	2.60454	34.1413	14.8767
SCH-	303.5	2.12364	7.24911	0.448568	7.07444	6.03952	4.08065	6.53961	10.0554	2.45688	41.3888	12.5434
SCH-	305	2.96765	11.0688	0.292269	10.6769	9.18847	4.54369	7.01382	7.7813	2.52942	28.5402	15.3975
SCH-	306.5	2.37723	11.8307	1.51586	9.07446	8.6815	4.41863	6.79397	7.81031	2.27431	29.4329	15.7901
SCH-	308	2.32294	10.9295	1.38496	9.14799	9.60073	4.06032	6.65544	6.2037	3.18611	29.4085	17.0998
SCH-	309.5	2.19047	11.7015	0.42966	7.09052	9.98322	5.0063	6.9528	7.1131	2.45455	33.2801	13.7977
SCH-	310.5	2.05876	12.2952	0.744392	9.06857	8.37813	4.46648	7.53657	7.69635	2.33991	30.8881	14.5275
SCH-	311	1.88847	11.1871	0.550774	8.68706	8.60726	4.69229	7.4512	7.17567	2.42791	31.1645	16.1678
SCH-	312.4	0.658137	14.0064	0.659092	12.4427	4.18489	1.62755	8.05898	8.2604	4.87166	28.1495	17.0808
SCH-	314	1.33264	10.9399	0.742599	6.79013	5.99297	3.80993	7.09884	7.94417	4.10291	35.7077	15.5382
SCH-	315.5	0.744476	10.23	0.421225	6.06366	6.5929	1.20252	4.37009	11.259	3.25262	39.1726	16.6909
SCH-	316.5	0.658137	14.0064	0.659092	12.4427	4.18489	1.62755	8.05898	8.2604	4.87166	28.1495	17.0808
SCH-	317	1.33264	10.9399	0.742599	6.79013	5.99297	3.80993	7.09884	7.94417	4.10291	35.7077	15.5382
SCH-	317.5	0.744476	10.23	0.421225	6.06366	6.5929	1.20252	4.37009	11.259	3.25262	39.1726	16.6909
SCH-	317.7	2.49169	8.62066	8.63282	10.7406	0.419156	5.32255	5.08707	2.31837	2.57772	37.0493	16.7401
SCH-	317.8	3.05989	8.03155	4.01512	11.9155	1.16609	6.14334	6.01456	3.55317	2.74789	40.0855	13.2674
SCH-	318.1	2.77441	6.24221	1.10764	10.8829	0.859724	5.16687	6.51214	3.15303	2.61358	39.6332	21.0543
SCH-	318.5	0.771939	2.90363	0.823435	6.76891	0.74699	4.08514	4.86347	3.18985	6.6255	52.7759	16.4452
SCH-	319.5	0.579074	2.84478	0.557309	7.70663	1.57938	4.07522	5.83396	4.10752	6.95848	51.8698	13.8879
SCH-	320	0.685791	4.6209	0.844012	13.0557	1.44616	6.03985	5.22934	5.45534	4.8479	47.0402	10.7348
SCH-	320.5	0.743102	4.32003	4.72264	10.1532	1.26312	4.3009	4.5023	5.48685	4.04599	46.6358	13.826
SCH-	321.3	2.49063	7.40919	6.08843	10.5677	1.03712	2.7966	3.84541	2.02499	3.32318	34.4092	26.0076
SCH-	322.2	1.60232	6.37153	4.8722	10.138	1.24557	2.5947	3.5445	1.88082	3.23684	33.318	31.1955
SCH-	322.5	1.55974	8.344	8.73397	9.97051	1.20716	2.65606	3.344	1.79227	3.41132	31.9524	27.0285
SCH-	323	2.92664	8.52932	2.39529	12.4047	0.735669	3.99121	4.5704	2.90741	3.3641	37.5705	20.6048
SCH-	324	0.791339	7.71153	15.5694	7.18764	0.820498	2.6261	3.48093	2.01654	2.45767	26.4289	30.9094
SCH-	324.4	0.607771	10.7239	9.99435	6.73835	1.02148	2.40365	3.03785	2.14819	2.38826	26.2379	34.6983
SCH-	325.7	2.60836	9.1325	1.39139	11.8489	0.720412	4.49452	5.31968	3.1572	3.80398	35.2736	22.2495
SCH-	326	2.89798	10.0096	1.47174	12.6079	1.03297	4.85941	6.72824	4.39837	4.04142	33.2413	18.7111
SCH-	328.5	2.48188	10.9419	4.30646	12.2429	1.24092	4.71712	6.11469	4.08702	3.65687	31.542	18.6682
SCH-	329	1.265	8.04582	6.34878	12.9645	1.29266	3.43133	4.45705	2.60569	5.6112	31.5554	22.4225
SCH-	330	1.4202	13.0136	9.12909	15.6771	1.08839	5.04052	4.77399	1.80841	4.9593	26.9332	16.1561
SCH-	331.5	1.79272	7.75032	0.649538	13.0572	0.779284	3.60451	4.74937	1.95193	4.72454	34.9599	25.9807
SCH-	333.5	2.44814	9.88445	1.13569	11.5776	1.11199	3.21122	6.26506	3.76419	3.99729	35.701	20.9034
SCH-	334	1.87153	8.51449	1.32948	9.19479	0.791212	3.11498	5.75975	4.81379	3.23295	41.6473	19.7297
SCH-	334.5	0.79006	8.20153	8.85686	8.15727	0.587252	3.05816	4.9376	4.57355	3.5382	36.8559	20.4436
SCH-	334.8	0.527111	7.67687	0.561882	9.71842	0.559447	4.7768	6.06367	4.47427	3.07103	44.2859	18.2846
SCH-	336	0.806618	0.387106	9.66018	12.7754	1.65111	2.79721	12.7994	8.52828	2.84896	41.5171	6.22872
SCH-	336.5	0.653364	5.3147	0.386322	10.9848	1.37044	2.73413	10.7917	7.86965	2.89089	45.841	11.1631
SCH-	337	2.08143	10.9732	0	18.5085	2.26223	5.63976	13.693	8.87925	3.702	31.9688	2.29194
SCH-	337.5	0.924212	9.8029	0.965647	14.3899	1.15984	3.65093	5.91637	1.85622	4.6395	34.28	22.4144

## Sheet: PCA PAH
Supplementary Data 2A - PCA analysis of PAH data
Depth	Coronene Index	(heavy pyro PAHs) / (light pyro PAHs)	PC 1 scores	PC 2 scores	PC 3 scores
234.8	0.482469	2.32231	14.096	-0.60453	-3.3754
236.1	0.441079	1.93841	11.136	-6.5445	10.906
237.4	0.413658	2.3897	10.594	-2.0466	-2.6944
240.7	0.244126	2.59555	-5.5941	-4.8688	0.60805
244.2	0.259666	2.55901	-3.3427	-5.4351	-0.33074
251.2	0.221549	3.04688	-11.083	-4.5258	4.0535
255.6	0.491532	2.85917	11.301	0.21132	9.1494
256.7	0.437408	3.46674	8.421	3.8151	-2.5712
257.8	0.429301	2.78167	11.328	0.018682	-4.5372
260.3	0.273929	3.41708	-5.9475	-2.6002	1.8123
266	0.221669	4.46767	-17.23	3.0889	6.4036
270	0.236649	4.68657	-14.889	3.5549	4.7796
275	0.28828	3.49451	-7.3302	1.3302	5.8856
277	0.319452	3.2185	-2.44	0.96175	5.5046
280	0.351792	2.02907	7.6182	-6.174	-1.3029
282	0.303176	1.93339	4.9825	-6.5668	-2.6298
284	0.335847	2.25684	4.6598	-3.8871	2.9907
286	0.401364	2.49234	7.6089	-0.12572	4.0735
290	0.273335	3.2418	-6.9062	-0.19847	6.1311
295.5	0.299902	3.43753	-3.8275	1.1162	3.5475
299.5	0.295577	2.08208	2.6617	-6.5772	1.5065
300.5	0.330209	1.85335	7.3335	-9.2415	1.7437
302	0.276741	2.22852	-0.96898	-6.3711	3.867
303.5	0.216218	3.00207	-8.7479	-4.0975	2.1257
305	0.317596	1.95951	5.2618	-7.8781	0.31546
306.5	0.318082	2.13267	4.6075	-6.8869	1.3652
308	0.33815	2.19504	5.352	-5.5886	1.8452
309.5	0.264913	2.05249	0.33117	-7.5411	2.9159
310.5	0.291237	2.12815	2.7727	-7.5501	0.89609
311	0.310773	2.19797	3.0338	-6.1067	1.8298
312.4	0.364524	3.44828	6.2666	-5.4864	-2.5362
314	0.282227	3.03541	-1.8721	-3.9282	2.291
315.5	0.292484	4.5791	-4.6451	-2.6953	5.3884
316.5	0.283193	4.23162	6.2666	-5.4864	-2.5362
317	0.222996	3.42414	-1.8721	-3.9282	2.291
317.5	0.31971	4.13378	-4.6451	-2.6953	5.3884
317.7	0.224336	7.24589	-1.3055	4.5711	-4.9106
317.8	0.198873	6.02572	-5.8101	1.0915	-5.6277
318.1	0.168218	4.67295	-2.9483	5.7287	-1.5939
318.5	0.213487	5.96774	-17.291	8.3725	0.75043
319.5	0.411426	6.2676	-17.602	5.5007	-0.54263
320	0.464854	7.53862	-13.765	1.0971	-5.6783
320.5	0.438511	7.11675	-12.201	4.4258	-2.8938
321.3	0.331445	5.03434	4.5859	9.5434	-0.44943
322.2	0.515463	7.74673	7.3499	12.489	2.1586
322.5	0.547812	8.95583	7.4641	10.148	-0.17047
323	0.35876	4.66614	-0.39917	5.3304	-3.0487
324	0.329352	3.60818	13.669	13.004	1.5433
324.4	0.339871	3.70103	15.463	13.127	4.6187
325.7	0.390573	5.70447	2.0029	4.9858	-2.1707
326	0.335678	3.89908	2.257	0.9678	-4.1473
328.5	0.40252	6.01005	4.1694	1.1805	-4.3717
329	0.349464	4.64864	5.7785	5.9185	-3.94
330	0.305925	5.60001	8.7169	0.28618	-9.5577
331.5	0.338708	6.49069	3.8978	8.0372	-1.6332
333.5	0.271498	5.5036	1.0685	3.5102	-2.1347
334	0.123236	2.80236	-5.1875	4.8777	-0.10894
334.5	0.186866	3.85186	-0.3872	6.4437	-0.91573
334.8	0.0574415	1.6034	-8.2462	4.8508	-0.94897
336	0.371436	5.2641	-11.977	-3.0064	-9.33
336.5	0.371793	4.4857	-13.505	-1.3291	-3.899
337	0.315004	3.11746	-3.6441	-14.414	-14.07
337.5	0.357072	2.28728	3.554	4.8015	-4.0293
